# Supplementary material for: Comparative genomics beyond sequence-based alignments: RNA structures in the ENCODE regions
Source: HighWire-hosted journal article supplement (doi:10.1101/gr.6887408), 2007-12-20
Supplement: supplement.zip [file Human Tissues.xls]

## Sheet: Sheet1
Total Human RNA Master Panel
Tissue	Source
Adrenal gland	pooled from 61 male/female Caucasians, ages 15-61
Bone marrow	pooled from 7 male/female Caucasians, ages 18-54
Brain, cerebellum	pooled from 24 male/female Caucasians, ages 16-70
Brain, whole	pooled from 4 male/female Caucasians, ages 46-61
Fetal brain	pooled from 21 male/female Caucasian fetuses, ages 26-40 weeks
Brain, hippocampus	pooled from 20 male/female Caucasians, ages 18-54
Heart	pooled from 25-yr-old male Asian and 74-yr-old male Caucasian
Kidney	pooled from 6 female Caucasians, ages 28-52
Liver	27-yr-old male Asian
Lung	27-yr-old male Asian
Placenta	pooled from 4 Caucasians, ages 21-39
Prostate	pooled from 32 male Caucasians, ages 21-50
Salivary gland	pooled from 24 male/female Caucasians, ages 16-60
Skeletal muscle	pooled from 7 male/female Caucasians, ages 20-68
Spleen	pooled from 14 male/female Caucasians, ages 30-66
Testis	pooled from 45 male Caucasians, ages 19-64
Thymus	pooled from 3 male Caucasians, ages 22, 30, 32
Thyroid gland	pooled from 65 male/female Caucasians, ages 15-61
Trachea	pooled from male/female Caucasians, ages 18-54
Uterus	pooled from 11 female Caucasians, ages 15-55
Colon w/mucosal lining	pooled from 3 male/female Caucasians, ages 20, 35, 55
Small intestine	pooled from 5 male/female Caucasians, ages 20-61
