# Supplementary material for: Comparative genomics beyond sequence-based alignments: RNA structures in the ENCODE regions
Source: HighWire-hosted journal article supplement (doi:10.1101/gr.6887408), 2007-12-20
Supplement: supplement.zip [file supplement.doc]

**Composite Score:**

We rank CMfinder motifs by a heuristic function over a set of motif features:

sp: the number of different species in which the motif occurs.

bp: the (weighted) number of base pairs in the consensus structure. To discriminate weak base pair from stronger ones, we weight the base pairs according to the partition function (Hofacker 95, McCaskill 90), which estimates the probability of forming a base pair averaged over all possible structures.

lc: local sequence conservation. To measure local sequence conservation, we first identify the conserved columns in the given alignment, defined as the columns with more than 70% sequence identity. Then we located all blocks with at least 4 consecutive conserved columns, and computed the total size of all such blocks in a given alignment.

sid: average pairwise sequence identify.

len: average sequence length.

The features are integrated in the following scoring function:

r = sp * sqrt(lc ) / sid * bp /len

We have tried to combine the features automatically using machine learning algorithms such as support vector- and logistic regression. However, due to the heterogeneity of the features, and limitations of available training data, the results were not as good as our hand-crafted composite scoring function in our preliminary experiment.

------

**Input and output files for Rfam family member RF00402:**

Input files for RNAz (the output files have the same name just ending with .rnaz):

RF00402.maf

- The original MULTIZ alignment (use option -r for RNAz since the ncRNA

is on the reverse strand)

RF00402_realigned.aln

- An .aln file for the CMfinder re-alignment (corresponding to RF00402.h2.1.4)

RF00402_realigned_same_species.aln

- The same as above, except that we chose the same six sequences as RNAz

selected for the original alignment.

Input file for CMfinder:

RF00402_reverse.fa

Output files for CMfinder:

RF00402.ranks

- The scores for all the CMfinder motifs

RF00402.h2.1.4.motif

- A Stockholm format file with the second highest scoring

motif, which has the same structure shape as the known snoRNA.

RF00402.h1.2.motif

- The highest scoring motif which contains the more stable/conserved

stem of the two stems in the known snoRNA.

Comments:

-The RNAz script for selecting 6 sequences from a given alignment (optimized to be as close to 80% sequence similarity as possible) selects different sequences for the original and the CMfinder re-alignment. Forcing RNAz to select the same sequences for the re-aligned sequences still results in a RNA prediction, just with a lower SVM probability (0.52). These are the files with "same_species" in their names.

------

**Database links for the RT-PCR confirmed candidates:**

The candidates for experimental verification were manually selected using our database. In addition to selecting candidates with good composite scores and low energies, we also required a minimum of 5 predicted compensatory base changes.

Energy <= -15 , Score >= 9 and CBC >= 6 , Length >= 60

1. http://genome.ku.dk/resources/cmf_encode/pages/candidate.php?id=r-870

2. http://genome.ku.dk/resources/cmf_encode/pages/candidate.php?id=f-3386

3. http://genome.ku.dk/resources/cmf_encode/pages/candidate.php?id=r-8563

4. http://genome.ku.dk/resources/cmf_encode/pages/candidate.php?id=r-881

5. http://genome.ku.dk/resources/cmf_encode/pages/candidate.php?id=f-5474

6. http://genome.ku.dk/resources/cmf_encode/pages/candidate.php?id=r-5191

7. http://genome.ku.dk/resources/cmf_encode/pages/candidate.php?id=r-2185

8. http://genome.ku.dk/resources/cmf_encode/pages/candidate.php?id=r-2187

9. http://genome.ku.dk/resources/cmf_encode/pages/candidate.php?id=r-8576

10. http://genome.ku.dk/resources/cmf_encode/pages/candidate.php?id=f-4923

11. http://genome.ku.dk/resources/cmf_encode/pages/candidate.php?id=r-6163

------

**Candidate selection:**

We calculated the number of predictions in our native data and compared it to the number of candidates in our shuffled data. We did this for several different cutoffs and selected a cutoff that gave a reasonable false positive rate as well as predicting a high number of candidates. The results are summarized in table S1.

| Energy/Score | >3 | >4 | >5 | >6 | >7 | >8 |
| --- | --- | --- | --- | --- | --- | --- |
| <0 | 73%/50198 | 67%/33292 | 60%/19606 | 57%/8242 | 52%/3421 | 52%/1391 |
| <-5 | 59%/19367 | 55%/14838 | **50%/10154** | 49%/4851 | 47%/2285 | 47%/1039 |
| <-10 | 53%/5360 | 48%/4358 | 46%/3215 | 48%/1669 | 50%/857 | 49%/434 |

**Table S1**. The false positive rates and the number of predictions for several Gibbs energy and composite score cutoffs. The selected cutoff is in bold face.

------

**RT-PCR primers:**

1f

5’ GAGAATTCCTAATGCTTGGTCGTCACCTCT

1r

5’ GAAAGCTTGCACGTTAAAATCACTTAGCAG

2f

5’ GAGAATTCGGCAAGTGGGGGCTAAAGTCCA

2r

5’ GAAAGCTTCTTTCTCTAGGCAAAGCAGCTT

3f

5’ GAGAATTCGCGCACGCGCACCCCGGGAGCC

3r

5’ GAAAGCTTGCGCACGCGCACAGCCGCGCTC

4f

5’ GAGAATTCGTGCACTTTGTCCACGCGCAGG

4r

5’ GAAAGCTTCCCGTTTTATGAGGAATAAAAG

5f

5’ GAGAATTCGCAATCAGCCCAGCCCACAAAG

5r

5’ GAAAGCTTCCTGTAAGATGGTGATTCCACC

6f

5’ GAGAATTCGTCCGGCCAGGGCTGGGACTGG

6r

5’ GAAAGCTTGGGAAAGCTGCTCCAAGGGCTC

7f

5’ GAGAATTCGTGGGTGGAGGTGCGAACTCGG

7r

5’ GAAAGCTTGCTTGGGCAGCTGCCTGACTGA

8f

5’ GAGAATTCGTAGAACTCTAGAGCTGGAATG

8r

5’ GAAAGCTTGCAGACAGGCTGGACAAAATCA

9f

5’ GAGAATTCGAGTGGGTAGATCTTTTAAGAG

9r

5’ GAAAGCTTCCCAGCAGACCACCACGGATCT

10f

5’ GAGAATTCAGAGTGGGTGGGCAAGGGAGAG

10r

5’ GAAAGCTTGGAGTGGCTTGTAAAAGCAAGG

11f

5’ GAGAATTCGCCACCTGCAGTTTCGAAGGGT

11r

5’ GAAAGCTTGCCCCCTGCACTGAGGCCAAGT

B-actin:

forward:  TGT GCC CAT CTA CGA GGG GTA TGC
Reverse:  GGT ACA TGG TGG TGC CGC CAG ACA

------

**P-values:**

The file P-values.txt (best viewed with notepad, emacs or similar) contains the p-values and the numbers these were calculated from, using the center, leftmost and rightmost nucleotides, respectively. Furthermore it contains P-values for RNAz and EvoFold candidates, which are completely within our MAF input blocks, against TARs/Transfrags.
